# Supplementary material for: COVID-19 generates hyaluronan fragments that directly induce endothelial barrier dysfunction
Source: JCI journal article supplement (doi:10.1172/jci.insight.147472), 2021-07-27
Supplement: sd1 [file 1]

## SUPPLEMENTAL MATERIAL

### Supplemental Figures

Figure S1

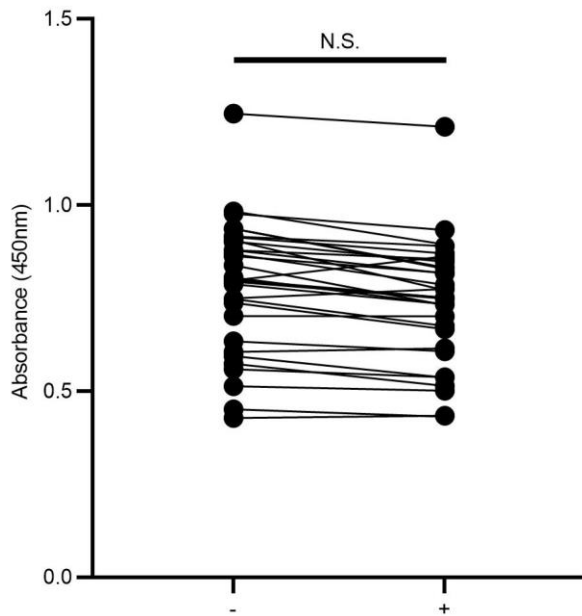

Supplemental Figure 1. **JM403-based ELISA Detection of Plasma HS Does Not Detect Exogenous Low Molecular Weight Heparin Anticoagulant Enoxaparin.** Plasma samples from healthy donors (n=10) or COVID-19 patients (n=32) were measured without (closed circles) or with (open circles) 200ng exogenous enoxaparin. Data are reported as mean  $\pm$  SEM. Differences between the groups were calculated using Mann-Whitney U tests.

Figure S2

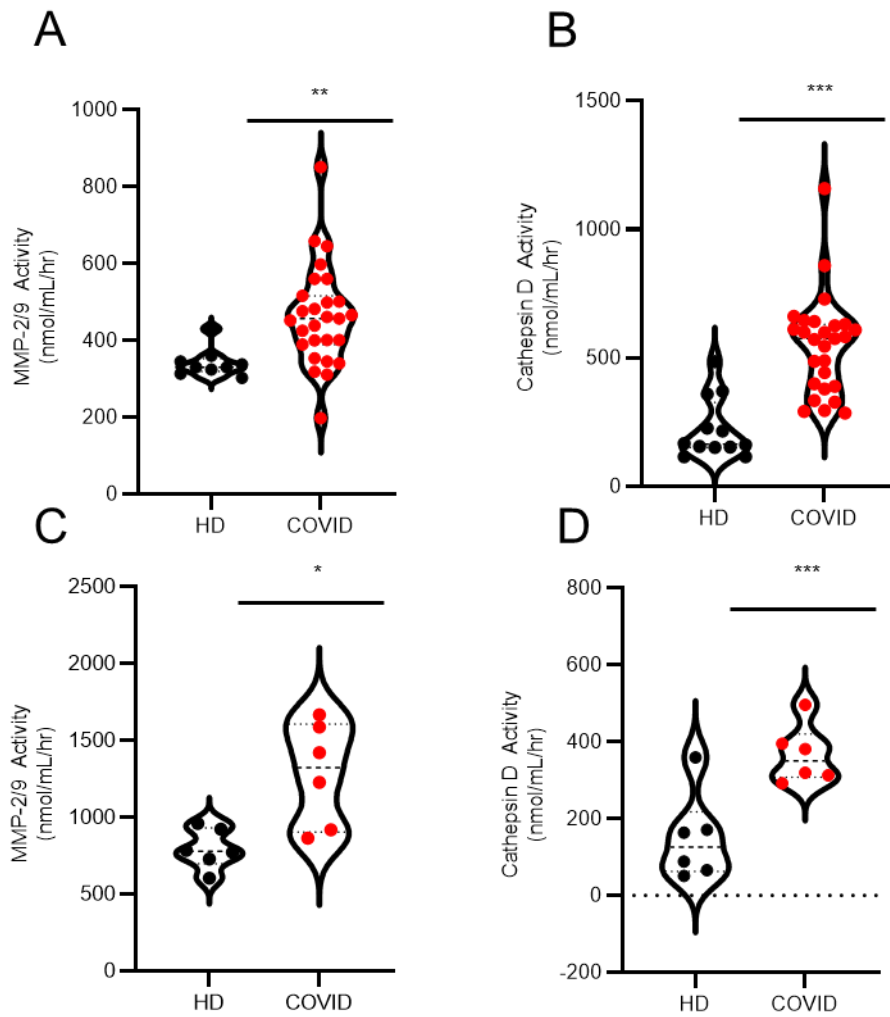

Supplemental Figure 2. **Sheddase activity is increased in COVID-19 patient plasma and released from plasma treated endothelial cells compared to healthy donor plasma.** Protease activity was measured for (A) MMP2/9 and (B) cathepsin D in healthy donors (n = 10) and COVID-19 patient plasma (n = 27). LMVECs were exposed to plasma from healthy donors or COVID-19 patients (n = 6 each). Differences between the groups were calculated using Mann-Whitney U test, \*\*p<0.01, \*\*\*p<0.001. Sheddase activity released into the media was measured for (C) MMP2/9 and (D) cathepsin D. Data are reported as mean  $\pm$  SEM. Differences between the groups were calculated using unpaired Student's t-test, 2 tailed, \*p<0.05, \*\*\*p<0.001.

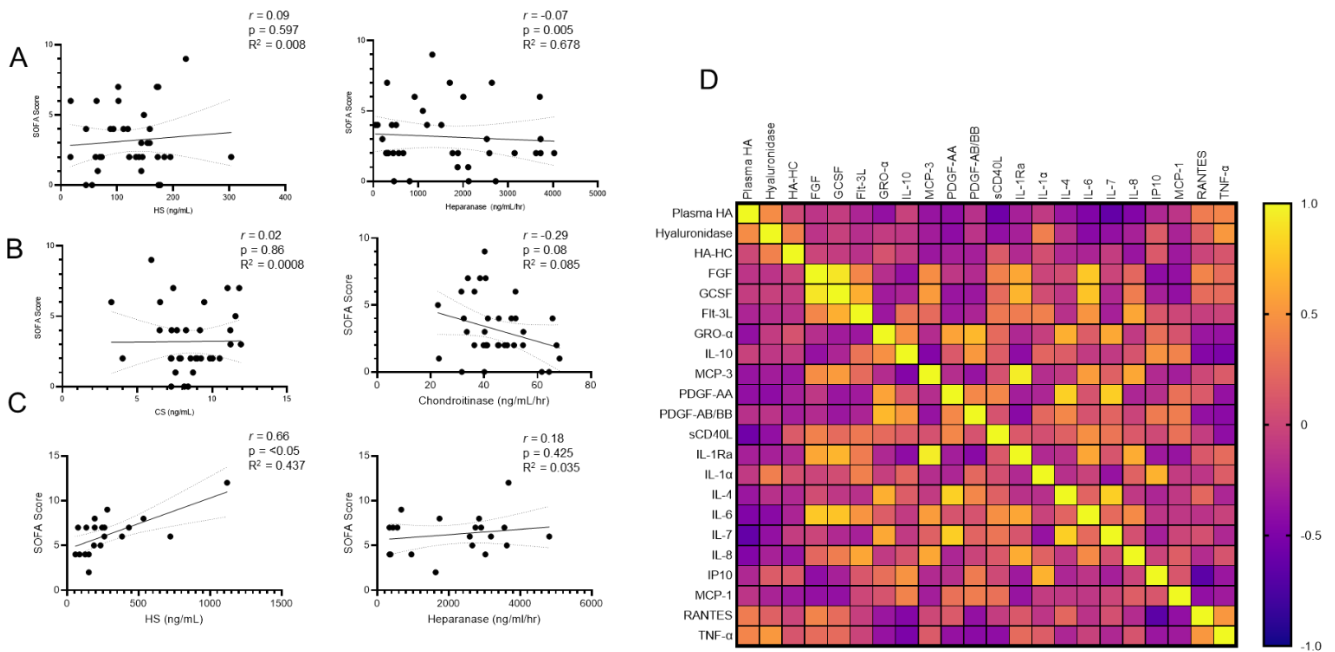

Supplemental Figure 3. **Circulating levels of HA and hyaluronidase activity correlate with clinical and inflammatory signatures of COVID-19.** Linear regression analysis of SOFA scores with (A) HS or heparanase and (B) CS or chondroitinase in COVID-19 patients (n=46). (C) Corellation analysis of SOFA scores with HS or heparanase in sepsis patients (n=23). Spearman correlation matrix (D) of plasma HA, hyaluronidase activity, and cytokine levels in healthy donors (n=18). Yellow indicates a positive correlation and purple indicates a negative correlation. Pearson correlation coefficient was used to determine the  $r$  value of the correlation between the 2 groups.

Figure S4.

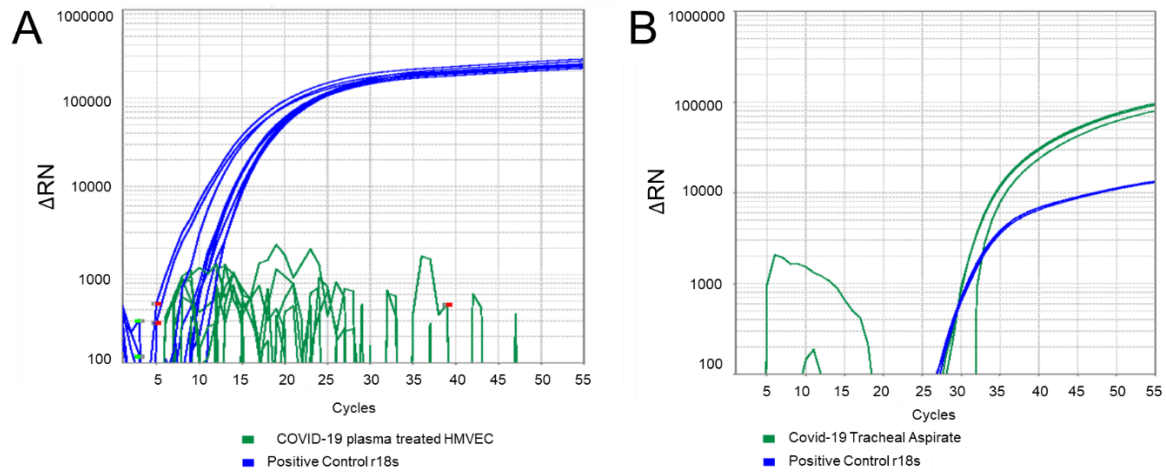

**Supplemental Figure 4. RT-PCR Analysis of LMVECs Treated With COVID-19 Plasma.**

Cells were cultured in the presence or absence of COVID-19 patient plasma for 24 hours and analyzed for the presence of the SARS-CoV-2 N1 gene. (A) Representative tracing from ECs treated with COVID-19 patient plasma samples (n = 12) for SARS-CoV-2 mRNA (green) or r18s mRNA (blue) as a positive control. (B) mRNA isolated from COVID-19 patient tracheal aspirates (n = 3) served as a positive control (green) for the detection of viral mRNA.

Figure S5.

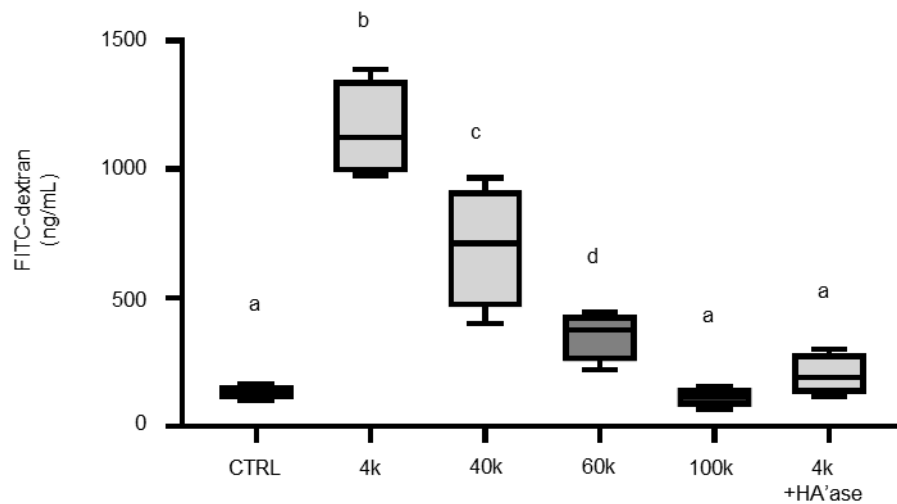

Supplemental Figure 5. **HA fragments <100 kDa induce a size-dependent disruption of the endothelial barrier permeability in LMVECs.** LMVEC were seeded on permeable supports (3  $\mu\text{m}$  pore size) placed into a 24-well plate and grown to confluence. Cells were treated with or without biosynthetic HA polymers of specific sizes (1000 ng) for 16 hours at 37°C to induce endothelial barrier disruption. The upper chamber was replaced with FITC-conjugated dextran (1 mg/mL, 40kDa) in PBS and a sample of medium from the lower chamber was measured after 1 hour. In some experiments, HA treatments were pre-digested with *Streptomyces* hyaluronidase (HA'ase) as a specificity control. Data is reported as mean  $\pm$  SEM; n = 5 independent experiments, statistics were calculated using a 1-way ANOVA followed by Tukey's multiple comparison tests. Different alphabetical superscripts are significantly different from each other,  $p < 0.05$ .

Figure S6.

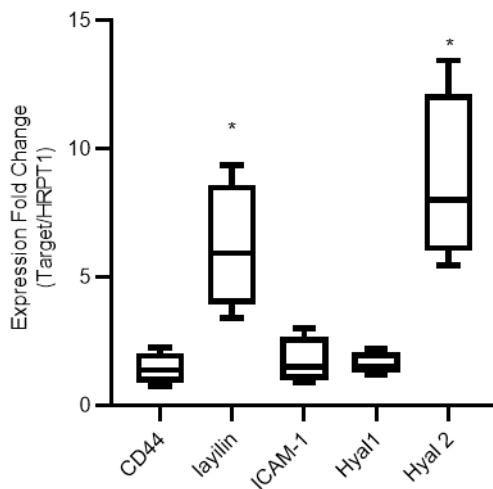

Supplemental Figure 6. **HA 4kDa treatment increases mRNA expression of layilin and Hyal-2.** LMVEC were seeded in a 6-well plate and grown to confluence. Cells were treated with or without biosynthetic HA 4kDa (1500 ng/mL) for 4 hours at 37°C. RNA was isolated from LMVEC and cDNA was made from RNA. qRT-PCR was used to measure relative mRNA expression levels of HA receptors (CD44, layilin), adhesive receptor ICAM-1, and hyaluronidases (Hyal-1, Hyal-2), normalized to housekeeping gene HPRT1. Biosynthetic HA 4kDa was pre-digested with *Streptomyces* hyaluronidase (HA'ase) as a specificity control. \* $p < 0.05$ , Student's t-test, 2-tailed,  $n = 5$  independent experiments. Data are reported as mean  $\pm$  SEM.

Figure S7.

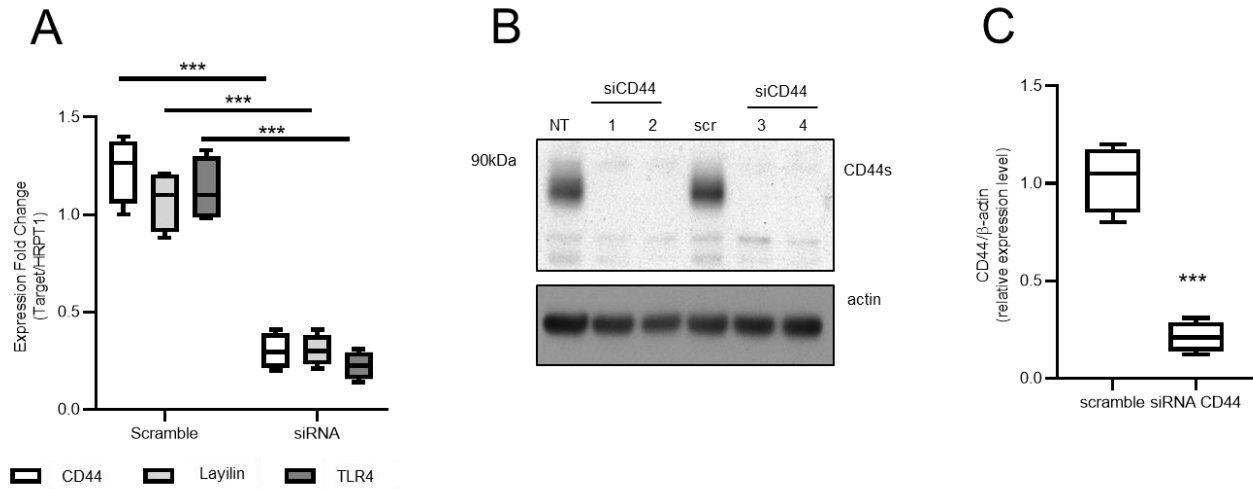

**Supplemental Figure 7. Targeted siRNA knockdown of HA-receptors.** LMVEC were seeded in a 6-well plate and grown to confluence. Cells were treated with either vehicle (NT), scrambled control siRNA (scr, 10nM), or siRNA to indicated HA receptors (10nM). (A) mRNA expression normalized to HPRT1. (B) Representative western blot analysis of CD44 protein levels from cells treated for 48hrs with 10nM CD44 siRNA. NT (no treatment), scr (scrambled control siRNA), numeric lanes indicate independent biological replicates. (C) Densitometry quantification of CD44 knock down. \*\*\* $p < 0.001$ , unpaired Student's t-test, 2-tailed,  $n = 5$  independent experiments. Data are reported as mean  $\pm$  SEM.

# Supplemental Tables

## A Supplemental Table 1

|               | Plasma HA    | Hyaluronidase | HA-HC        | FGF          | GCSF        | IFN- $\beta$ | GRO          | IL-10        | MCP-3        | PDGF-AA      | PDGF-AB/BB   | sCD40L       | IL-1RA      | IL-1a       | IL-4        | IL-6         | IL-7        | IL-8         | IP10        | MCP-1        | RANTES       | TNfa         |              |
|---------------|--------------|---------------|--------------|--------------|-------------|--------------|--------------|--------------|--------------|--------------|--------------|--------------|-------------|-------------|-------------|--------------|-------------|--------------|-------------|--------------|--------------|--------------|--------------|
| Plasma HA     | 0.41681979   | 0.41681979    | 0.640112775  | 0.145478721  | 0.283704768 | -0.322445419 | 0.073197362  | 0.513474026  | 0.346839002  | 0.144464857  | 0.384950636  | 0.259672613  | 0.55420668  | 0.339773839 | 0.174604844 | 0.171066753  | 0.273568971 | 0.661657305  | 0.684958884 | 0.778090834  | -0.324258103 | 0.62502706   |              |
| Hyaluronidase | 0.41681979   | 0.69359234    | 0.69359234   | 0.250575193  | 0.269596972 | -0.44257053  | 0.50288983   | 0.337271388  | 0.066992575  | 0.612471773  | 0.03198823   | 0.49630061   | 0.18893308  | 0.437286546 | 0.51313508  | 0.345191527  | 0.411797065 | 0.280687591  | 0.503250782 | 0.322685192  | -0.118786508 | 0.370579623  |              |
| HA-HC         | 0.640112775  | 0.69359234    | 0.69359234   | 0.587536832  | 0.561559581 | 0.681796741  | 0.185790439  | 0.612802663  | 0.330531833  | 0.30382428   | 0.598136877  | 0.41626888   | 0.531984727 | 0.280889506 | 0.633536318 | 0.338105064  | 0.469653362 | 0.667509549  | 0.508303604 | -0.351898256 | 0.440642826  |              |              |
| FGF           | 0.145478721  | 0.250575193   | 0.250575193  | 0.687536832  | 0.681796741 | 0.091850704  | 0.067698063  | 0.139376693  | 0.388888018  | 0.115546439  | 0.198697473  | 0.384843485  | 0.349947157 | 0.388895124 | 0.20926382  | 0.257850046  | 0.183234861 | 0.209464846  | 0.15138799  | 0.078192667  | 0.084698261  | 0.38078776   |              |
| GCSF          | 0.283704768  | 0.269596972   | 0.269596972  | 0.587536832  | 0.561559581 | 0.681796741  | 0.091850704  | 0.067698063  | 0.139376693  | 0.115546439  | 0.198697473  | 0.384843485  | 0.349947157 | 0.388895124 | 0.20926382  | 0.257850046  | 0.183234861 | 0.209464846  | 0.15138799  | 0.078192667  | 0.084698261  | 0.38078776   |              |
| IFN- $\beta$  | -0.322445419 | -0.44257053   | -0.303425481 | 0.091850704  | 0.067698063 | 0.11812028   | 0.057568014  | -0.220707645 | -0.025768014 | 0.07568014   | 0.206183504  | 0.32213346   | 0.07302548  | 0.209078506 | 0.351565189 | 0.248445878  | 0.499744862 | 0.245320281  | 0.179479583 | 0.341575777  | 0.322836946  | 0.286623235  | 0.205467496  |
| GRO           | 0.073197362  | 0.50288983    | 0.50288983   | 0.185790439  | 0.067698063 | 0.11812028   | 0.057568014  | -0.220707645 | -0.025768014 | 0.07568014   | 0.206183504  | 0.32213346   | 0.07302548  | 0.209078506 | 0.351565189 | 0.248445878  | 0.499744862 | 0.245320281  | 0.179479583 | 0.341575777  | 0.322836946  | 0.286623235  | 0.205467496  |
| IL-10         | 0.513474026  | 0.337271388   | 0.337271388  | 0.612802663  | 0.598136877 | 0.067698063  | 0.139376693  | 0.388888018  | 0.388888018  | 0.115546439  | 0.198697473  | 0.384843485  | 0.349947157 | 0.388895124 | 0.20926382  | 0.257850046  | 0.183234861 | 0.209464846  | 0.15138799  | 0.078192667  | 0.084698261  | 0.38078776   |              |
| MCP-3         | 0.346839002  | 0.066992575   | 0.066992575  | 0.330531833  | 0.388888018 | 0.32213346   | 0.005376261  | -0.032493906 | 0.373366404  | 0.177436393  | 0.122397998  | 0.243986347  | 0.680315106 | 0.667101184 | 0.021184165 | 0.232974931  | 0.69921875  | 0.154067452  | 0.643769983 | 0.117206608  | 0.186163418  | 0.063097309  | 0.13100343   |
| PDGF-AA       | 0.144464857  | 0.612471773   | 0.612471773  | 0.115546439  | 0.073302548 | -0.18666754  | 0.591472016  | 0.177436393  | 0.122397998  | 0.177436393  | 0.122397998  | 0.243986347  | 0.680315106 | 0.667101184 | 0.021184165 | 0.232974931  | 0.69921875  | 0.154067452  | 0.643769983 | 0.117206608  | 0.186163418  | 0.063097309  | 0.13100343   |
| PDGF-AB/BB    | 0.384950636  | 0.603198823   | 0.603198823  | 0.198697473  | 0.209078506 | -0.145309285 | 0.565922189  | 0.243986347  | 0.296344712  | 0.680315106  | 0.850396456  | 0.178449825  | 0.293505962 | 0.414211045 | 0.294636592 | 0.562404563  | 0.43325608  | 0.274829474  | 0.132119722 | 0.062488201  | 0.353488218  |              |              |
| sCD40L        | 0.259672613  | 0.49630061    | 0.49630061   | 0.384843485  | 0.351565189 | -0.04366724  | 0.542865122  | 0.216006837  | 0.397599197  | 0.667101184  | 0.850396456  | 0.285061565  | 0.475487476 | 0.496690705 | 0.338212664 | 0.658145691  | 0.496503224 | 0.28191998   | 0.193390304 | 0.018279168  | 0.475948282  |              |              |
| IL-1RA        | 0.18893308   | 0.18893308    | 0.531984727  | 0.349947157  | 0.248445878 | -0.151264301 | 0.570384482  | 0.675483501  | 0.021184165  | 0.178449825  | 0.285061565  | 0.475487476  | 0.496690705 | 0.338212664 | 0.658145691 | 0.496503224  | 0.28191998  | 0.193390304  | 0.018279168 | 0.475948282  |              |              |              |
| IL-1a         | 0.339773839  | 0.437286546   | 0.437286546  | 0.198697473  | 0.209078506 | -0.145309285 | 0.565922189  | 0.243986347  | 0.296344712  | 0.680315106  | 0.850396456  | 0.178449825  | 0.293505962 | 0.414211045 | 0.294636592 | 0.562404563  | 0.43325608  | 0.274829474  | 0.132119722 | 0.062488201  | 0.353488218  |              |              |
| IL-4          | 0.174604844  | 0.51313508    | 0.51313508   | 0.20889506   | 0.20926382  | 0.245320281  | 0.242197074  | 0.741005805  | 0.091361299  | 0.662937959  | 0.69921875   | 0.414211045  | 0.496690705 | 0.008946478 | 0.471775371 | 0.399288915  | 0.610429489 | 0.548942486  | 0.711436713 | 0.419746602  | -0.081343514 | 0.36834519   |              |
| IL-6          | 0.717066753  | 0.345191527   | 0.345191527  | 0.687536832  | 0.681796741 | 0.091850704  | 0.067698063  | 0.139376693  | 0.388888018  | 0.115546439  | 0.198697473  | 0.384843485  | 0.349947157 | 0.388895124 | 0.20926382  | 0.257850046  | 0.183234861 | 0.209464846  | 0.15138799  | 0.078192667  | 0.084698261  | 0.38078776   |              |
| IL-7          | 0.273568971  | 0.411797065   | 0.411797065  | 0.338105064  | 0.183234861 | 0.341575777  | 0.021937674  | 0.031109117  | 0.483597928  | 0.331091117  | 0.483597928  | 0.154067452  | 0.652405963 | 0.658145691 | 0.376885125 | 0.102194948  | 0.095320963 | 0.334979214  | 0.591792205 | 0.44072491   | 0.325819811  | 0.02964895   | 0.419539757  |
| IL-8          | 0.661657305  | 0.280687591   | 0.280687591  | 0.469653362  | 0.209464846 | 0.322836946  | 0.00988902   | 0.171140169  | 0.338894333  | 0.72455472   | 0.117206608  | 0.496503224  | 0.569624396 | 0.548942486 | 0.200319523 | 0.581453768  | 0.697922005 | 0.52034755   | 0.50755038  | -0.121068308 | 0.675110088  |              |              |
| IP10          | 0.684958884  | 0.503250782   | 0.503250782  | 0.667509549  | 0.15138799  | 0.286623235  | -0.274497816 | 0.184290438  | 0.323784948  | 0.185163418  | 0.274829474  | 0.28191998   | 0.496205504 | 0.711436713 | 0.394302355 | 0.590575333  | 0.44072491  | 0.520034755  | 0.701874015 | -0.305792832 | 0.383724012  |              |              |
| MCP-1         | 0.778090834  | 0.322685192   | 0.322685192  | 0.508303604  | 0.078192667 | 0.205467496  | -0.155074931 | 0.027822074  | 0.447887151  | 0.248149173  | 0.053097309  | 0.132119722  | 0.193390304 | 0.532451866 | 0.419746602 | 0.103942168  | 0.709753753 | 0.325819811  | 0.507055038 | 0.701874015  | -0.409632268 | 0.602255344  |              |
| RANTES        | -0.324258103 | -0.118786508  | -0.118786508 | -0.351898256 | 0.084698261 | 0.032248324  | 0.032248324  | 0.120908257  | -0.161734346 | -0.370035568 | -0.121352024 | 0.0624988201 | 0.18279168  | 0.018279168 | -0.26445315 | -0.091343514 | 0.049371193 | -0.371167931 | 0.02694895  | -0.121068308 | -0.305792832 | -0.409632268 | -0.135483893 |
| TNfa          | 0.62502706   | 0.370579623   | 0.370579623  | 0.440642826  | 0.38078776  | 0.432593315  | -0.165718968 | 0.214117078  | 0.343133589  | 0.384197082  | 0.155417622  | 0.354882818  | 0.475948282 | 0.533704627 | 0.36834519  | 0.242438542  | 0.608728567 | 0.419539712  | 0.675110088 | 0.383724012  | 0.602255344  | -0.135483893 |              |

## B

|               | Plasma HA   | Hyaluronidase | HA-HC       | FGF         | GCSF        | IFN- $\beta$ | GRO         | IL-10        | MCP-3       | PDGF-AA     | PDGF-AB/BB  | sCD40L      | IL-1RA      | IL-1a       | IL-4        | IL-6        | IL-7        | IL-8        | IP10        | MCP-1       | RANTES      | TNfa        |
|---------------|-------------|---------------|-------------|-------------|-------------|--------------|-------------|--------------|-------------|-------------|-------------|-------------|-------------|-------------|-------------|-------------|-------------|-------------|-------------|-------------|-------------|-------------|
| Plasma HA     | 0.041724653 | 0.000323253   | 0.000323253 | 0.426933485 | 0.115230483 | 0.063019698  | 0.890536136 | 0.002650211  | 0.050514142 | 0.43019722  | 0.029586734 | 0.151218043 | 0.000997761 | 0.057089893 | 0.339180153 | 3.88356E-06 | 0.12976246  | 3.7288E-05  | 1.52658E-05 | 1.593E-07   | 0.072026336 | 0.0001311   |
| Hyaluronidase | 0.041724653 | 0.000323253   | 0.000323253 | 0.216955859 | 0.182896272 | 0.023570488  | 0.088337877 | 0.0091997329 | 0.092105659 | 0.000881466 | 0.001106431 | 0.009914729 | 0.356287141 | 0.025489003 | 0.007592236 | 0.0841467   | 0.036594372 | 0.164847891 | 0.008775097 | 0.107878043 | 0.586380478 | 0.062371887 |
| HA-HC         | 0.000323253 | 0.000323253   | 0.000323253 | 0.001271457 | 0.002304751 | 0.123908632  | 0.353496952 | 0.000678454  | 0.034998519 | 0.0009831   | 0.003791389 | 0.004323593 | 0.02089845  | 0.155828804 | 0.000388828 | 0.084540055 | 0.013447899 | 0.000142573 | 0.000787003 | 0.01649727  | 0.021423096 |             |
| FGF           | 0.426933485 | 0.216955859   | 0.216955859 | 0.001271457 | 0.002304751 | 0.123908632  | 0.353496952 | 0.000678454  | 0.034998519 | 0.0009831   | 0.003791389 | 0.004323593 | 0.02089845  | 0.155828804 | 0.000388828 | 0.084540055 | 0.013447899 | 0.000142573 | 0.000787003 | 0.01649727  | 0.021423096 |             |
| GCSF          | 0.115230483 | 0.182896272   | 0.182896272 | 0.002304751 | 0.002304751 | 0.123908632  | 0.353496952 | 0.000678454  | 0.034998519 | 0.0009831   | 0.003791389 | 0.004323593 | 0.02089845  | 0.155828804 | 0.000388828 | 0.084540055 | 0.013447899 | 0.000142573 | 0.000787003 | 0.01649727  | 0.021423096 |             |
| IFN- $\beta$  | 0.063019698 | 0.023570488   | 0.023570488 | 0.59418362  | 0.482638932 | 0.05818362   | 0.694330691 | 0.417529113  | 0.019073327 | 0.502179246 | 0.245341479 | 0.020491898 | 0.036416168 | 0.019079454 | 0.220617292 | 0.128937196 | 0.04555129  | 0.220164108 | 0.378119333 | 0.65033193  | 0.61605572  | 0.021933096 |
| GRO           | 0.890536136 | 0.008337877   | 0.008337877 | 0.353496952 | 0.694330691 | 0.482638932  | 0.694330691 | 0.417529113  | 0.019073327 | 0.502179246 | 0.245341479 | 0.020491898 | 0.036416168 | 0.019079454 | 0.220617292 | 0.128937196 | 0.04555129  | 0.220164108 | 0.378119333 | 0.65033193  | 0.61605572  | 0.021933096 |
| IL-10         | 0.002650211 | 0.091997329   | 0.091997329 | 0.000678454 | 0.000678454 | 0.000678454  | 0.000678454 | 0.000678454  | 0.000678454 | 0.000678454 | 0.000678454 | 0.000678454 | 0.000678454 | 0.000678454 | 0.000678454 | 0.000678454 | 0.000678454 | 0.000678454 | 0.000678454 | 0.000678454 | 0.000678454 |             |
| MCP-3         | 0.050514142 | 0.043019722   | 0.043019722 | 0.029586734 | 0.151218043 | 0.000997761  | 0.057089893 | 0.339180153  | 3.88356E-06 | 0.12976246  | 3.7288E-05  | 1.52658E-05 | 1.          |             |             |             |             |             |             |             |             |             |



# A Supplemental Table 2

|               | Plasma HA    | Hyaluronidase | HA-HC        | FGF          | GCSF         | FR-3L        | GRO          | IL-10        | MCP-3        | PDGF-AA      | PDGF-AB/BB   | sCD40L       | IL-1RA       | IL-1a        | IL-4         | IL-6         | IL-7         | IL-8         | IP10         | MCP-1        | RANTES       | TNfa         |             |
|---------------|--------------|---------------|--------------|--------------|--------------|--------------|--------------|--------------|--------------|--------------|--------------|--------------|--------------|--------------|--------------|--------------|--------------|--------------|--------------|--------------|--------------|--------------|-------------|
| Plasma HA     |              | 0.445459815   | 0.011214059  | -0.127447405 | -0.07008568  | -0.236912752 | -0.386584037 | -0.038098136 | -0.361681641 | -0.394990308 | -0.155754485 | -0.572847224 | -0.272477259 | -0.091575231 | -0.341776974 | -0.48672547  | -0.633954516 | -0.476635941 | -0.220456294 | -0.124542581 | 0.349931295  | 0.410259923  |             |
| Hyaluronidase | 0.445459815  |               | 0.383163924  | -0.129553884 | -0.043832771 | -0.170892672 | -0.081573778 | -0.106818244 | -0.300115747 | -0.419705208 | -0.133742369 | -0.393186779 | -0.274610555 | 0.367395301  | -0.193869262 | -0.442246409 | -0.384986097 | -0.263830309 | 0.137909699  | -0.252153299 | 0.173677741  | 0.519511532  |             |
| HA-HC         | 0.011214059  | 0.383163924   |              | -0.017583893 | -0.070208984 | -0.236912752 | -0.386584037 | -0.038098136 | -0.361681641 | -0.394990308 | -0.155754485 | -0.572847224 | -0.272477259 | -0.091575231 | -0.341776974 | -0.48672547  | -0.633954516 | -0.476635941 | -0.220456294 | -0.124542581 | 0.349931295  | 0.410259923  |             |
| FGF           | -0.127447405 | -0.129553884  | -0.017583893 |              | 0.912622737  | 0.415342188  | -0.174560461 | -0.378511519 | 0.455073789  | -0.111576028 | -0.198230833 | 0.387621464  | 0.603804225  | -0.19463794  | 0.042035463  | 0.771773436  | -0.01905227  | 0.219004844  | -0.410117105 | -0.382373099 | 0.397440598  | 0.249507592  |             |
| GCSF          | -0.07008568  | -0.043832771  | -0.070208984 | 0.912622737  |              | 0.415342188  | -0.174560461 | -0.378511519 | 0.455073789  | -0.111576028 | -0.198230833 | 0.387621464  | 0.603804225  | -0.19463794  | 0.042035463  | 0.771773436  | -0.01905227  | 0.219004844  | -0.410117105 | -0.382373099 | 0.397440598  | 0.249507592  |             |
| FR-3L         | -0.236912752 | -0.170892672  | -0.148934868 | 0.415342188  | 0.912622737  |              | 0.641278733  | 0.350436339  | -0.217730799 | -0.413132944 | -0.424111942 | 0.418006438  | -0.287640171 | -0.235209976 | 0.220389169  | 0.054511959  | -0.172651224 | 0.462769777  | 0.305409129  | 0.125428965  | 0.194427427  | 0.28074691   |             |
| GRO           | -0.386584037 | -0.081573778  | 0.079563953  | -0.174560461 | -0.378511519 | 0.641278733  |              | 0.350436339  | -0.217730799 | -0.413132944 | -0.424111942 | 0.418006438  | -0.287640171 | -0.235209976 | 0.220389169  | 0.054511959  | -0.172651224 | 0.462769777  | 0.305409129  | 0.125428965  | 0.194427427  | 0.28074691   |             |
| IL-10         | -0.038098136 | -0.0618244    | -0.338864345 | 0.455073789  | 0.455073789  | 0.350436339  | 0.350436339  |              | 0.469653163  | -0.188209012 | 0.63249966   | 0.519706178  | 0.148982814  | -0.413132944 | 0.200587518  | 0.147633014  | -0.086202264 | -0.090536261 | 0.089429131  | 0.489325798  | 0.394477225  | -0.4649094   | 0.511215807 |
| MCP-3         | -0.361681641 | -0.300115747  | -0.338864345 | 0.455073789  | 0.455073789  | 0.350436339  | 0.350436339  | 0.469653163  |              | -0.188209012 | 0.63249966   | 0.519706178  | 0.148982814  | -0.413132944 | 0.200587518  | 0.147633014  | -0.086202264 | -0.090536261 | 0.089429131  | 0.489325798  | 0.394477225  | -0.4649094   | 0.511215807 |
| PDGF-AA       | -0.394990308 | -0.419075028  | -0.274610555 | -0.111576028 | -0.353191034 | -0.313572338 | 0.583375729  | 0.124428495  | -0.179882376 |              | 0.424111942  | 0.418006438  | -0.287640171 | -0.235209976 | 0.220389169  | 0.054511959  | -0.172651224 | 0.462769777  | 0.305409129  | 0.125428965  | 0.194427427  | 0.28074691   |             |
| PDGF-AB/BB    | -0.155754485 | -0.133742369  | -0.278511519 | -0.198230833 | -0.338388769 | -0.242336509 | 0.63249966   | 0.519706178  | 0.148982814  | -0.413132944 | -0.424111942 | 0.418006438  | -0.287640171 | -0.235209976 | 0.220389169  | 0.054511959  | -0.172651224 | 0.462769777  | 0.305409129  | 0.125428965  | 0.194427427  | 0.28074691   |             |
| sCD40L        | -0.572847224 | -0.393186779  | 0.136525921  | 0.387621464  | 0.240965946  | 0.328858662  | 0.235229878  | 0.148982814  | 0.469653163  | -0.188209012 | 0.63249966   | 0.519706178  | 0.148982814  | -0.413132944 | 0.200587518  | 0.147633014  | -0.086202264 | -0.090536261 | 0.089429131  | 0.489325798  | 0.394477225  | -0.4649094   | 0.511215807 |
| IL-1ra        | -0.272477259 | -0.274610555  | -0.201047074 | 0.603804225  | 0.673781892  | 0.350436339  | 0.350436339  | 0.469653163  | -0.188209012 | 0.63249966   | 0.519706178  | 0.148982814  | -0.413132944 | 0.200587518  | 0.147633014  | -0.086202264 | -0.090536261 | 0.089429131  | 0.489325798  | 0.394477225  | -0.4649094   | 0.511215807  |             |
| IL-1r1        | -0.091575231 | 0.367696301   | 0.055779365  | -0.019463784 | 0.036643499  | 0.37392224   | -0.058317288 | 0.200587518  | -0.177631721 | -0.235209976 | 0.220389169  | 0.054511959  | -0.172651224 | 0.462769777  | 0.305409129  | 0.125428965  | 0.194427427  | 0.28074691   | 0.125428965  | 0.194427427  | 0.28074691   | 0.125428965  |             |
| IL-4          | -0.341776974 | -0.158389626  | -0.210988972 | 0.042035463  | -0.107013914 | -0.15758225  | 0.642888097  | 0.147633014  | -0.082901372 | 0.809326541  | 0.417680166  | 0.172651224  | -0.148129258 | -0.161016288 | -0.161016288 | -0.161016288 | 0.192497029  | 0.238982517  | 0.437910267  | -0.129011129 | -0.115824259 | -0.041186196 |             |
| IL-6          | -0.48672547  | -0.442246409  | -0.240022446 | 0.771773436  | 0.751099704  | 0.490429722  | 0.145968812  | -0.086202264 | 0.543807063  | 0.080393761  | 0.076658763  | 0.482769777  | 0.595641558  | -0.32664778  | 0.192497029  | 0.238982517  | 0.437910267  | 0.437910267  | 0.437910267  | 0.437910267  | 0.437910267  | 0.437910267  |             |
| IL-7          | -0.633954516 | -0.384986097  | -0.067180503 | -0.19195627  | -0.210870284 | -0.273507748 | 0.60534657   | 0.109536261  | 0.173468717  | 0.305409129  | 0.190490129  | 0.090493662  | -0.370038075 | 0.807763219  | 0.238982517  | 0.437910267  | 0.437910267  | 0.437910267  | 0.437910267  | 0.437910267  | 0.437910267  | 0.437910267  |             |
| IL-8          | -0.476635941 | -0.263830309  | -0.353157335 | 0.219004844  | 0.358023065  | 0.598273601  | -0.096587353 | 0.089429131  | 0.601972939  | -0.234300092 | -0.022298334 | 0.125428965  | 0.627550047  | 0.183459554  | -0.100033519 | 0.437910267  | 0.437910267  | 0.437910267  | 0.437910267  | 0.437910267  | 0.437910267  | 0.437910267  |             |
| IP10          | -0.220456294 | 0.137909699   | 0.123034456  | -0.410117105 | 0.273904512  | 0.107188747  | 0.285229807  | 0.489325798  | -0.205653442 | -0.163789022 | 0.345165981  | 0.194427427  | -0.318594174 | 0.657943286  | 0.233899939  | -0.129011129 | -0.28051553  | -0.102791334 | 0.100414037  | 0.100414037  | 0.100414037  | 0.100414037  |             |
| MCP-1         | -0.124542581 | -0.252153299  | -0.324690778 | -0.383273099 | -0.387391401 | -0.002521863 | 0.084938376  | 0.394477225  | -0.288210461 | 0.281647841  | 0.360590314  | 0.28074691   | -0.361812913 | -0.079565545 | -0.100394834 | -0.11582343  | -0.054062827 | 0.157169164  | 0.100414037  | 0.100414037  | 0.100414037  | 0.100414037  |             |
| RANTES        | 0.349931295  | 0.173677741   | -0.017470034 | 0.397440598  | 0.249236473  | -0.055042767 | -0.34387662  | -0.4649094   | 0.004389624  | 0.128923404  | -0.385267907 | 0.12113702   | -0.119283471 | 0.217040123  | -0.137462259 | 0.060073255  | -0.187998812 | -0.678301262 | -0.39178003  | -0.39178003  | -0.39178003  | -0.39178003  |             |
| TNfa          | 0.410259923  | 0.519511532   | 0.093998496  | 0.249507592  | 0.24551292   | -0.025804457 | -0.370878481 | -0.511215807 | 0.132530146  | -0.375669976 | -0.427892347 | -0.407500236 | 0.241005111  | 0.150844484  | -0.233405294 | -0.041186196 | -0.2207496   | 0.087124385  | -0.34619471  | 0.314688149  | 0.512111352  | 0.512111352  |             |

# B

|               | Plasma HA   | Hyaluronidase | HA-HC       | FGF         | GCSF        | FR-3L       | GRO         | IL-10       | MCP-3       | PDGF-AA     | PDGF-AB/BB  | sCD40L      | IL-1RA      | IL-1a       | IL-4        | IL-6        | IL-7        | IL-8        | IP10        | MCP-1       | RANTES      | TNfa        |             |
|---------------|-------------|---------------|-------------|-------------|-------------|-------------|-------------|-------------|-------------|-------------|-------------|-------------|-------------|-------------|-------------|-------------|-------------|-------------|-------------|-------------|-------------|-------------|-------------|
| Plasma HA     |             | 0.083774075   | 0.968360413 | 0.6640876   | 0.811812331 | 0.414781423 | 0.172125836 | 0.897116211 | 0.203845473 | 0.162178793 | 0.594527699 | 0.032226867 | 0.3459539   | 0.755533112 | 0.231686764 | 0.077565285 | 0.014807043 | 0.084862517 | 0.448835015 | 0.67144472  | 0.220012076 | 0.145116622 |             |
| Hyaluronidase | 0.083774075 |               | 0.158617329 | 0.158617329 | 0.658908895 | 0.881722404 | 0.559132454 | 0.781606799 | 0.716715196 | 0.297117197 | 0.135825953 | 0.648519668 | 0.162488406 | 0.341983757 | 0.19807039  | 0.596256083 | 0.113331792 | 0.174057908 | 0.362071835 | 0.638241555 | 0.38447174  | 0.552647627 | 0.05890185  |
| HA-HC         | 0.968360413 | 0.158617329   |             | 0.952424373 | 0.611494304 | 0.11494304  | 0.611494304 | 0.786874085 | 0.781843621 | 0.236212399 | 0.347818907 | 0.33490707  | 0.641647859 | 0.490695115 | 0.84973836  | 0.489029608 | 0.408137652 | 0.819500849 | 0.215496469 | 0.675193653 | 0.257363388 | 0.952732118 | 0.749250833 |
| FGF           | 0.6640876   | 0.158617329   | 0.952424373 |             | 5.31059E-06 | 0.139710503 | 0.550989855 | 0.102044267 | 0.102044267 | 0.704134339 | 0.496915893 | 0.170878646 | 0.022222227 | 0.947344181 | 0.886543118 | 0.001222531 | 0.947232009 | 0.451733529 | 0.145270518 | 0.176145686 | 0.15936479  | 0.389663041 |             |
| GCSF          | 0.811812331 | 0.881722404   | 0.611494304 | 5.31059E-06 |             | 0.013447454 | 0.281921739 | 0.411072796 | 0.049972284 | 0.21549607  | 0.236647752 | 0.406603634 | 0.008240929 | 0.910206535 | 0.715763933 | 0.001956825 | 0.469285318 | 0.208796159 | 0.343332317 | 0.171451518 | 0.390179338 | 0.397530043 |             |
| FR-3L         | 0.414781423 | 0.559132454   | 0.11494304  | 0.139710503 | 0.139710503 |             | 0.240825309 | 0.294170624 | 0.408979261 | 0.274954223 | 0.403857421 | 0.250952663 | 0.219853842 | 0.187824167 | 0.590557912 | 0.075001068 | 0.344059986 | 0.023812517 | 0.715368183 | 0.993137131 | 0.851747171 | 0.930223888 |             |
| GRO           | 0.172125836 | 0.781606799   | 0.786874085 | 0.550598995 | 0.281921739 | 0.240825309 |             | 0.090186303 | 0.090186303 | 0.519344648 | 0.00697802  | 0.418201425 | 0.454604248 | 0.843024452 | 0.013179613 | 0.618536559 | 0.021779552 | 0.74255204  | 0.359435894 | 0.72210086  | 0.228644907 | 0.191730522 |             |
| IL-10         | 0.897116211 | 0.716715196   | 0.781843621 | 0.182032444 | 0.411072796 | 0.294170624 | 0.090186303 |             | 0.092267015 | 0.671700105 | 0.066808999 | 0.11227107  | 0.142037314 | 0.491707736 | 0.614501348 | 0.769512146 | 0.757197118 | 0.761108068 | 0.07575873  | 0.162784396 | 0.093932266 | 0.061716066 |             |
| MCP-3         | 0.203845473 | 0.297117197   | 0.236212399 | 0.102044267 | 0.049972284 | 0.408979261 | 0.519344648 | 0.092267015 |             | 0.538317168 | 0.19774978  | 0.801931314 | 3.84195E-07 | 0.54394659  | 0.778132856 | 0.044416788 | 0.55313     |             |             |             |             |             |             |
